# Supplementary material for: Classification and regression tree (CART) analyses of genomic signatures reveal sets of tetramers that discriminate temperature optima of archaea and bacteria
Source: Hindawi journal article supplement (doi:10.1155/2008/829730), 2007-06-08
Supplement: f2 [file 829730.f2.pdf]

Table S2. Classification and regression tree analysis results using 4 oligonucleotide frequency lengths over the entire virtual coding strand to classify organisms into two temperature optimum ranges, hyperthermophile versus non-hyperthermophile (hyper vs. non-hyper) and mesophile versus non-mesophile (meso vs. non-meso). Tetramers provide the most effective classification scheme considering both models built. Model-with-all is the number of misclassifications when building a model using all 195 genomes. Leave-one-out is the number of mispredictions when classifying an organism against a model built using the other 194 genomes.

| Motif length (L-mer) | Model-with-all      |                   | Leave-one-out       |                   |
|----------------------|---------------------|-------------------|---------------------|-------------------|
|                      | Hyper vs. non-hyper | Meso vs. non-meso | Hyper vs. non-hyper | Meso vs. non-meso |
| 2-mer                | 5 (2.6%)            | 8 (4.1%)          | 10 (5.1%)           | 24 (12.3%)        |
| 3-mer                | 4 (2.1%)            | 6 (3.1%)          | 12 (6.2%)           | 14 (7.2%)         |
| 4-mer                | 2 (1.0%)            | 9 (4.6%)          | 8 (4.1%)            | 14 (7.2%)         |
| 5-mer                | 2 (1.0%)            | 9 (4.6%)          | 13 (6.7%)           | 23 (11.8%)        |
